# Supplementary material
Source: PubMed Central journal article supplement (PMC5964508)

# **MicroRNA-216a inhibits NF- $\kappa$ B-mediated inflammatory cytokine production in teleost fish by modulating p65**

Tianjun Xu<sup>1,2,3,\*</sup>, Qing Chu<sup>1,2,3</sup>, Junxia Cui<sup>4</sup>, Ruixuan Huo<sup>4</sup>

- 1. Key Laboratory of Exploration and Utilization of Aquatic Genetic Resources (Shanghai Ocean University), Ministry of Education, 201306, China*
- 2. International Research Center for Marine Biosciences at Shanghai Ocean University, Ministry of Science and Technology, 201306, China*
- 3. National Pathogen Collection Center for Aquatic Animals, Shanghai Ocean University, 201306, China*
- 4. College of Marine Science, Zhejiang Ocean University, Zhoushan, 316022, China*

\*Corresponding author. Dr. Tianjun Xu

E-mail: tianjunxu@163.com

**Table S1 PCR primer sequence information in this study.**

| <b>Primers</b>                | <b>Sequences (5'-3')</b>                  |
|-------------------------------|-------------------------------------------|
| <b>Real-time PCR</b>          |                                           |
| miR-216a-qRT-F                | CAGTAATCTCTGCAGGCAAC                      |
| miR-216a-qRT-R                | GTCCAGTTTTTTTTTTTTTTTCACAG                |
| 5.8S rRNA-qRT-F               | AACTCTTAGCGGTGGATCA                       |
| 5.8SrRNA-qRT-R                | GTTTTTTTTTTTTTTTGCCGAGTG                  |
| p65-qRT-F                     | CGCTGTTCTTCAGGGACGACT                     |
| p65-qRT-R                     | CCTGCTGCTTCACCTCCACAT                     |
| IL-8-qRT-F                    | AGCAGCAGAGTCTTCGT                         |
| IL-8-qRT-R                    | TCTTCGCAGTGGGAGTT                         |
| TNF $\alpha$ -qRT-F           | GTTTGCTTGGTACTGGAATGG                     |
| TNF $\alpha$ -qRT-R           | TGTGGGATGATGATCTGGTTG                     |
| IL1 $\beta$ -qRT-F            | CATAAGGATGGGGACAACGAG                     |
| IL1 $\beta$ -qRT-R            | TAGGGGACGGACACAAGGGTA                     |
| IL6-qRT-F                     | GCGGTAAAGGCATGGATAT                       |
| IL6-qRT-R                     | GTTGTAGTTGGAAGGGCAG                       |
| $\beta$ -actin-qRT-F          | GAGCCGCACGCTTCTTT                         |
| $\beta$ -actin-qRT-R          | CTGCTGTAGCCGAGGAC                         |
| <b>Vector construction</b>    |                                           |
| pre-miR-216a-KpnIF            | CGCGAGCTCCTGATGTCCGCTGATGAG               |
| pre-miR-216a-XbaI R           | TGCTCTAGATCATCTCCAAAGCACATT-              |
| pre-miR-216a-Mut-F            | ACTGGGTAtgcTCTGCAGGCAACTGTGATGGT          |
| pre-miR-216a-Mut- R           | TGCAGAgcaTACCCAGTCAGACCAACATACAAAC        |
| p65-3'UTR-Wt-SacIF            | CGCGAGCTCCTGATGTCCGCTGATGAG               |
| p65-3'UTR-Wt-XbaIR            | TGCTCTAGATCATCTCCAAAGCACATT               |
| p65-3'UTR-Mut-F               | CAGATTTGACGTATCGGGTTATCCACCAACAAAC        |
| p65-3'UTR-Mut-R               | CCCGATACGTCAAATCTGGCTGACACAGTGGTA         |
| <i>Lep</i> 65-3'UTR-Wt-SacIF  | CGCGAGCTCATCCATTGCCCTTGTTA                |
| <i>Lep</i> 65-3'UTR-Wt- XbaIR | TGCTCTAGAGTTTGCATAGCCTTACCG               |
| <i>Lep</i> 65-3'UTR-Mut-F     | GTCAGCCAGATTTGcttTTATCGGGTTATCAACCAACAAAC |
| <i>Lep</i> 65-3'UTR-Mut-R     | aagCAAATCTGGCTGACACAGTGGTGGAAAAT          |
| <i>Drp</i> 65-3'UTR-Wt-SacIF  | CGCGAGCTCGAGAATACTGTCCTGCACCC             |
| <i>Drp</i> 65-3'UTR-Wt-XbaIR  | TGCTCTAGAGCTCCGATGTAATCTGATGT             |
| <i>Drp</i> 65-3'UTR-Mut-F     | GATteaTACATCGGAGCGATCAGCTTGTATG           |
| <i>Drp</i> 65-3'UTR-Mut-R     | GCTCCGATGTAtgaATCTGATGTTGTTTTGAACATTATGGG |
| p65-BamHIF                    | CGCGGATCCATGGCGGATGTGTACGGA               |
| p65-XbaIR                     | AACTCTGGATCATCTCCAAAGCACATT               |
| GFP- p65-3'UTR-Wt-HindIIIF    | CCAAGCTTGCTAGCTGATGTCCGCTGATGAG           |
| GFP-p65-3'UTR- Wt-BamHIR      | CGCGGATCCTCATCTCCAAAGCACATT               |
| GFP- p65-3'UTR-Mut-HindIIIF   | GATTTGAtcaTATCGGGTTATCCACCAACAAAC         |
| GFP-p65-3'UTR-Mut-BamHIR      | CCCGATAtgaTCAAATCTGGCTGACACAGTGG          |

|                 |                                                       |
|-----------------|-------------------------------------------------------|
| TSS-1359-F      | tcttacgcgtgctagcccgggATGAGTAGAATTGTCCTTTTATTCTTCCTTAA |
| TSS-1230-F      | tcttacgcgtgctagcccgggAGCTCAGTGGGACCCGAAGC             |
| TSS-636-F       | tcttacgcgtgctagcccgggTGAGTCTTAACCACCAGGACTTCTT        |
| TSS-270-F       | tcttacgcgtgctagcccgggGTCCCAAGTGAGAGGCCTGG             |
| TSS-117-F       | tcttacgcgtgctagcccgggTAGGGTCAAAGCTTGGTCTCT            |
| TSS-Universal R | cagtaccggaatgccaagcttCAGAGATTACCCAGTCAGACCAACA        |
| Ap1 mut1 F      | CCGCTCGAGCCCCGGGCTAGCACGCGTAAGA                       |
| Ap1 mut1 R      | CCGCTCGAGCCACCAGGACTTCTTATATTG                        |
| Sp1 mut1 F      | CCGCTCGAGCAAGGTGACAAAATTTACAC                         |
| Sp1 mut1 R      | CCGCTCGAGGTTTCAGTGTTTGTGAGGTC                         |
| Sp1 mut2 F      | CCGCTCGAGCACCCTCACCAGCCTTCAGC                         |
| Sp1 mut2 R      | CCGCTCGAGGTGACATCTGACCTCTAACTG                        |
| Ap1 mut2 F      | CCGCTCGAGAGTTAGAGGTCAGATGTCACC                        |
| Ap1 mut2 R      | CCGCTCGAGCCCTGGAGGATACGGCTCAAC                        |
| Sp1 mut3 F      | CCGCTCGAGTGAGCCGTATCCTCCAGGGTC                        |
| Sp1 mut3 R      | CCGCTCGAGTCACCATGGTAACACAGGACC                        |
| Sp1 mut4 F      | CCGCTCGAGGTCCTGTGTTACCATGGTGAT                        |
| Sp1 mut4 R      | CCGCTCGAGTAGGGTCAAAGCTTGGTCTCT                        |

**Table S2 Comparison of the differentially expressed miRNAs.** miRNAs with  $|\log_2 (IN/CO)| \geq 1$  and P-value  $< 0.01$  were defined as the significantly differential ones. Experiment group (IN) and control group (CO).

| miR_name         | Sequence (5'-3')        | CG-std  | IG-std | Fold-change<br>(log2 IG/CG) | P-value<br>(IG/CG) |
|------------------|-------------------------|---------|--------|-----------------------------|--------------------|
| miR-132-1-3p     | UACAGUCUACAGCCAUGGUCG   | 54.66   | 7.03   | -2.96                       | 1.03E-70           |
| miR-217-5p       | UACUGCAUCAGGAACUGAUUGGC | 9.46    | 1.55   | -2.61                       | 6.65E-12           |
| miR-8159-5p      | UCAGUAACUGGAAUCUGUCCUG  | 15.68   | 2.81   | -2.48                       | 6.58E-18           |
| novel-mir-176-3p | UACCAUGACGUCAUCUCCACG   | 5.65    | 1.83   | -1.63                       | 9.38E-05           |
| miR-129-1-3p     | AAGCCCUAACCCAAAAAGCAU   | 8.19    | 2.81   | -1.54                       | 5.56E-06           |
| novel-mir-63-5p  | ACGCAUGGGGACGGGAAGUAUGG | 3.57    | 1.41   | -1.35                       | 7.42E-03           |
| miR-2188-3p      | GCUGUGUGAGGUCAGACCUAUC  | 4.27    | 1.83   | -1.22                       | 6.40E-03           |
| miR-150-5p       | ACUCCCAAUCCUUGUACCAGUG  | 149.91  | 73.29  | -1.03                       | 5.72E-47           |
| miR-2188-5p      | AAGGUCCAACCUCACAUGUCCU  | 1238.03 | 614.56 | -1.01                       | 0.00E+00           |
| novel-mir-153-5p | UCUGUACUGUGAGGACAUGU    | 16.95   | 40.51  | 1.26                        | 7.09E-19           |
| miR-15b-2-3p     | CGAACCAUUAUUUGCUGCUUUA  | 57.20   | 148.26 | 1.37                        | 4.59E-74           |
| novel-mir-19-5p  | UGCAAGAAGUAGAUAGACACCU  | 1.15    | 3.66   | 1.67                        | 1.08E-03           |
| miR-216a-2-5p    | UAAUCUCUGCAGGCAACUGUGA  | 9.57    | 33.90  | 1.82                        | 8.96E-27           |

**Fig. S1 pre-miR-216a targets the 3'UTR of miiuy croaker p65 gene.** (A) The construction of the pre-miR-216a plasmid. (B) The construction of the mutant type of pre-miR-216a plasmid. (C) HEK293 cells were cotransfected with the wild type of p65-3'UTR (Wt-UTR) or the mutant type of p65-3'UTR (Mut-UTR), together with pcDNA6.2 or the mutant type of pre-miR-216a plasmid. pcDNA6.2 were used to control the same amount of molecules for transfections. The luciferase activity was determined and normalized by Renilla luciferase activity. Data are presented as the means  $\pm$  SE from at least three independent triplicated experiments. \*\*,  $p < 0.01$  versus the controls.

**Fig. S1**

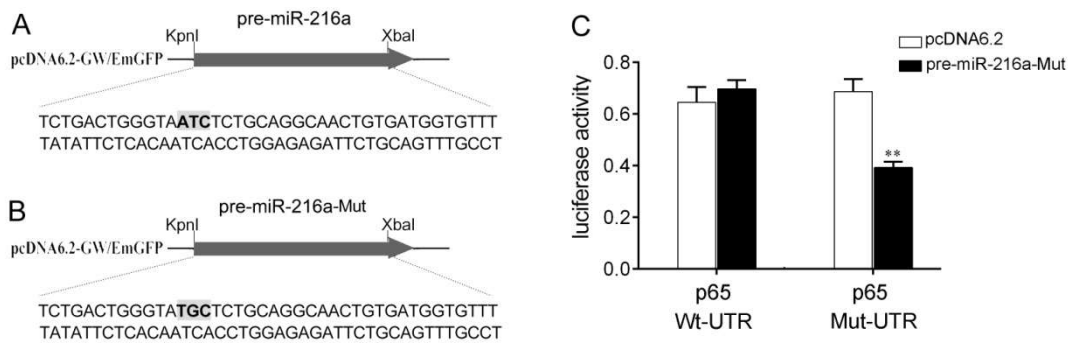

Supplement: IAI.00256-18_zii999092432s1.pdf [file IAI.00256-18_zii999092432s1.pdf]
